# Supplementary material for: APLP1 is endoproteolytically cleaved by γ-secretase without previous ectodomain shedding
Source: PubMed Central journal article supplement (PMC5789831; doi:10.1038/s41598-018-19530-8), 2018-01-30

## Supplemental Information

**APLP1 is endoproteolytically cleaved by  $\gamma$ -secretase without previous ectodomain shedding**

**Linda Schauenburg<sup>1,§</sup>, Filip Liebsch<sup>2</sup>, Murat Eravci<sup>1</sup>, Magnus C. Mayer<sup>1,#</sup>, Christoph Weise<sup>1</sup>, Gerhard Multhaup<sup>1,2†</sup>**

<sup>1</sup> Institut für Chemie und Biochemie, Freie Universität Berlin, Thielallee 63, 14195 Berlin, Germany

<sup>2</sup> Department of Pharmacology & Therapeutics and Integrated Program in Neuroscience, McGill University, 3655 Promenade Sir William Osler, Montreal, QC, Canada, H3G 1Y6

<sup>§</sup> present address: Sphingotec Therapeutics GmbH, Neuendorfstr. 15a, 16761 Hennigsdorf, Germany

<sup>#</sup> present address: Miltenyi Biotec GmbH, Robert-Koch-Strasse 1, 17166 Teterow, Germany

<sup>†</sup> **Corresponding Author:** Gerhard Multhaup, Tel.: (514) 398-3621, Fax: (514) 398-2045, E-mail: [gerhard.multhaup@mcgill.ca](mailto:gerhard.multhaup@mcgill.ca)

**The following pages include:**

**Supplementary Figure legends**

**Supplemental Figure 1**

**Supplemental Figure 2**

**Supplemental Figure 3**

**Supplemental Figure 4**

**Supplemental Figure 5**

## Supplementary Figure Legends

**Supplementary Figure 1:** Number of actual repeats and representative full-length blots of cropped blots shown in Figure 1. (a) Blots with antibodies against APP (corresponding to Figures 1a-b), (b) Blots with antibodies against APLP2 (corresponding to Figures 1c-d), (c) Blots with antibodies against APLP1 (corresponding to Figures 1e-f), (d) Blots with antibodies against overexpressed APLP1 in SH-SY5Y cells (corresponding to Figures 1g-h), (e) Blots with antibodies against endogenous APLP1 (corresponding to figure 1i). Transfected and untransfected cells were treated with  $\alpha$ - (GM6001, Calbiochem),  $\beta$ - ( $\beta$ -secretase inhibitor IV, Calbiochem) or  $\gamma$ -secretase inhibitor (L-685, Calbiochem). Conditioned media were analyzed using specific antibodies for the soluble ectodomains (APLP1 – 42464; APLP2 – 8-1; APP – W0-2 or  $\alpha$ sAPP $\beta$ ), the A $\beta$ -region (APLP1 –  $\alpha$ A1 $\beta$ 1-28; APLP2 – 907899; APP – 4G8) or the C-terminus (APLP1 –  $\alpha$ FLAG/ 907892; APLP2 –  $\alpha$ FLAG; APP – 27576). M – conditioned medium, L – lysate, / (M) – conditioned medium of untransfected cells.

**Supplementary Figure 2:** Full-length blots of cropped blots shown in Figures 2 a and b. (a) Blots with antibodies against APLP1 and soluble APLP1 species in lysate (L) and medium (M) of APLP1 overexpressing HEK293T cells (corresponding to Figure 2a). (b) Blots with antibodies against APLP1 treated with different GSIs (corresponding to Figure 2b), (c) Blots with antibodies against APLP1 treated with different GSIs, repeated experiment (corresponding to Figure 2b).  $\alpha$  – GM6001;  $\beta$  –  $\beta$ -secretase-inhibitor IV;  $\gamma$  –  $\gamma$ -secretase inhibitor, L – L685; D – DAPT; I – GSI I; III – GSI III; 42464 - antibody against the soluble APLP1 ectodomain,  $\alpha$ A1 $\beta$ 1-28 – antibody against the APLP1 A $\beta$ -region; M – conditioned medium, L – lysate.

**Supplementary Figure 3:** Full-length blots of cropped blots shown in Figures 2c. (a) Blots with antibodies against APLP1 cotransfected with BACE1 or ADAM10 (at the right is the antiA1 $\beta$ 1-28 blot at a shorter exposure time (“short”). (b) Blots with antibodies against APLP1 cotransfected with BACE1 or ADAM10, repeated experiment; 42464 - antibody against the soluble APLP1 ectodomain,  $\alpha$ A1 $\beta$ 1-28 – antibody against the APLP1 A $\beta$ -region; M – conditioned medium, L – lysate.

**Supplementary Figure 4:** Full-length blots of cropped blot of APLP1 deletion mutants shown in Figure 4b, at the right is the antiA1 $\beta$ 1-28 blot at a shorter exposure time (“short”).

**Supplementary Figure 5:** Full-length blots of cropped blots of APLP1-APP chimeras shown in Figures 4d-f. (a)  $\alpha$ A1 $\beta$ 1-28 blots detecting  $\gamma$ -cleaved soluble domain of APP (APLP1 TMS) chimera without or with YFP-tag on the full-length protein (corresponding to Figure 4d), (b) Blots detecting soluble APLP1 species of APLP1 WT and APLP1 (APP TMS) chimera (corresponding to Figure 4e), (c) Blots detecting soluble APP species of APP WT and APP (APLP1 TMS), full-length proteins without YFP tag (corresponding to Figure 4f, upper blots “APP”), (D) Blots detecting soluble APP species of APP WT and APP (APLP1 TMS), full-length proteins with YFP tag (corresponding to Figure 4f, lower blots “APP YFP”). 42464 - antibody against the soluble APLP1 ectodomain,  $\alpha$ A1 $\beta$ 1-28 – antibody against the APLP1 A $\beta$ -region; 4B4 - antibody against the sAPP $\alpha$ , 4G8 – antibody against the APP A $\beta$ -region, 27675 – antibody against the APP C-terminus; M – conditioned medium, L – lysate, m – mature, im – immature.

# Suppl. Fig. 1

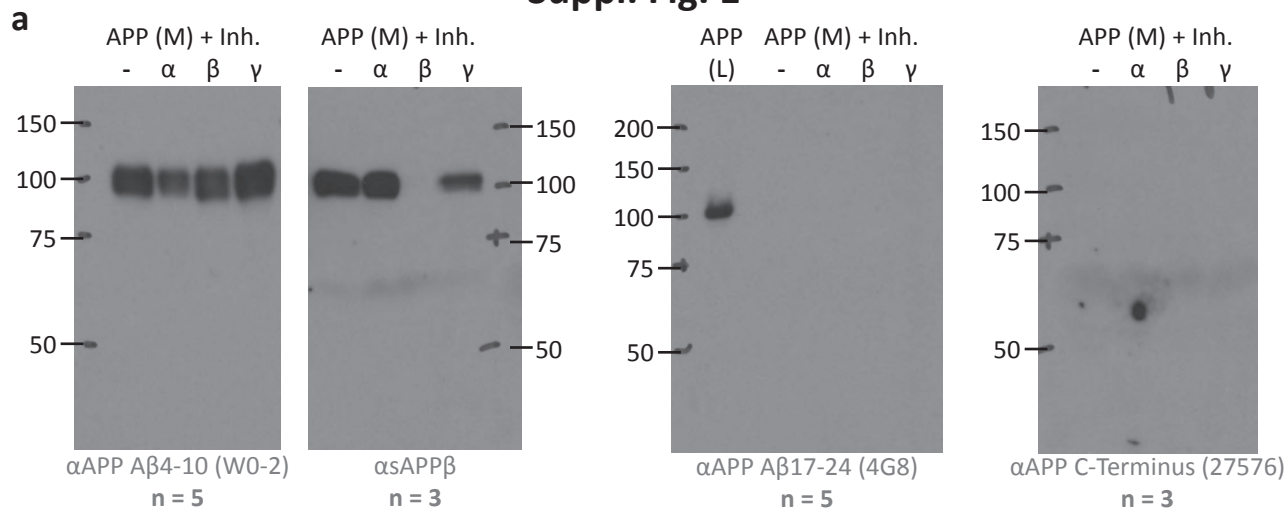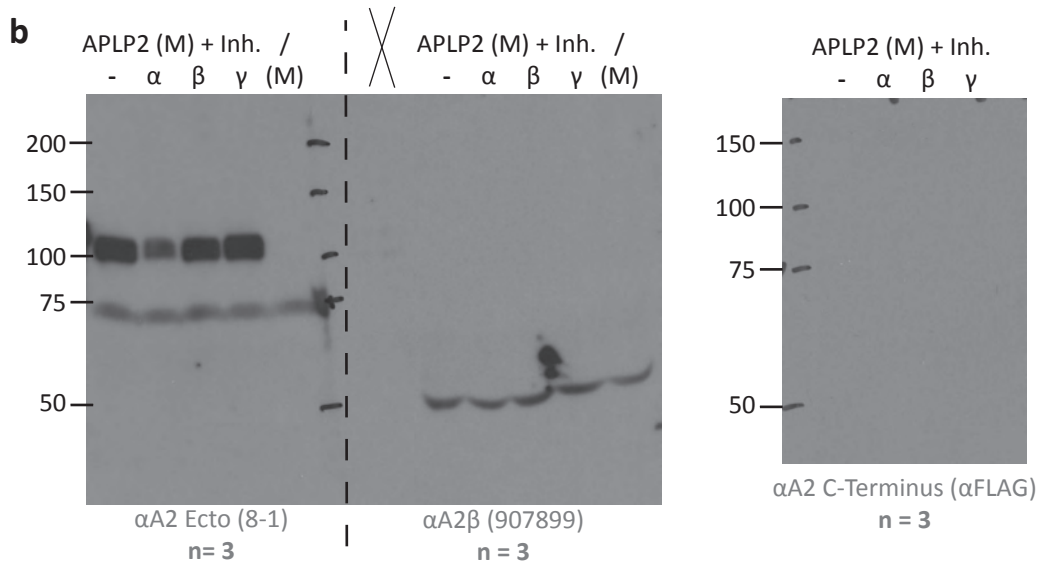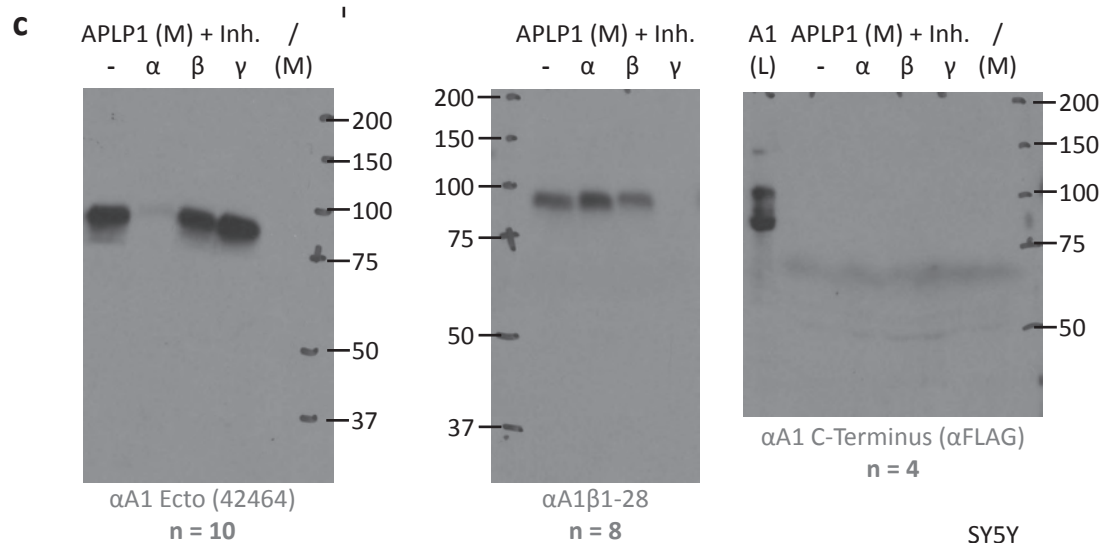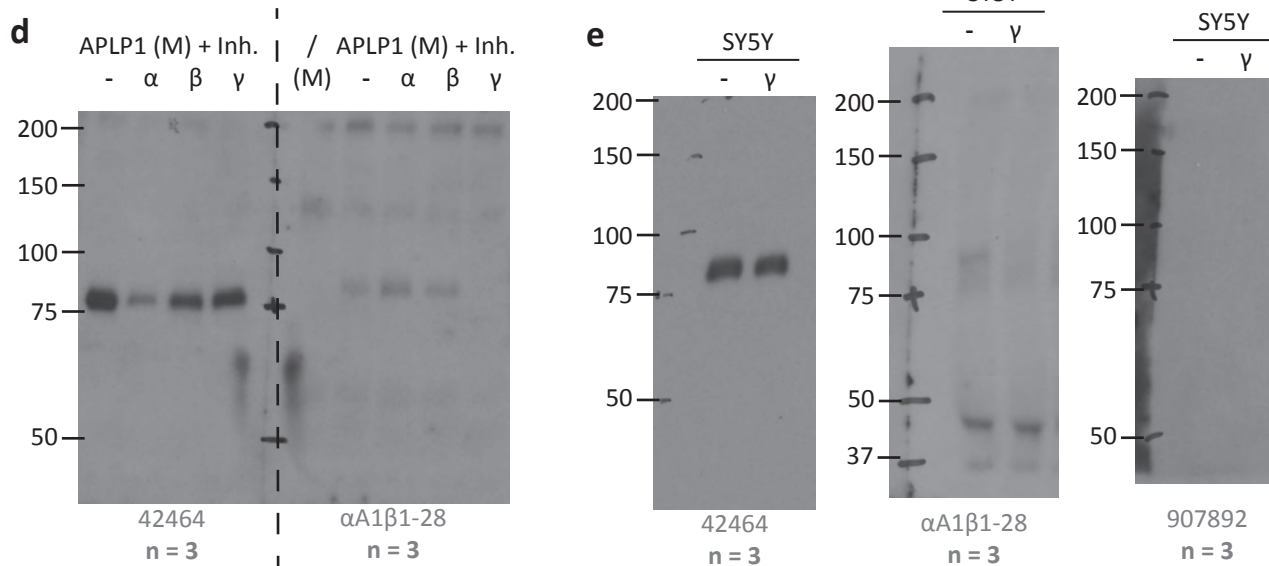

## Suppl. Fig. 2

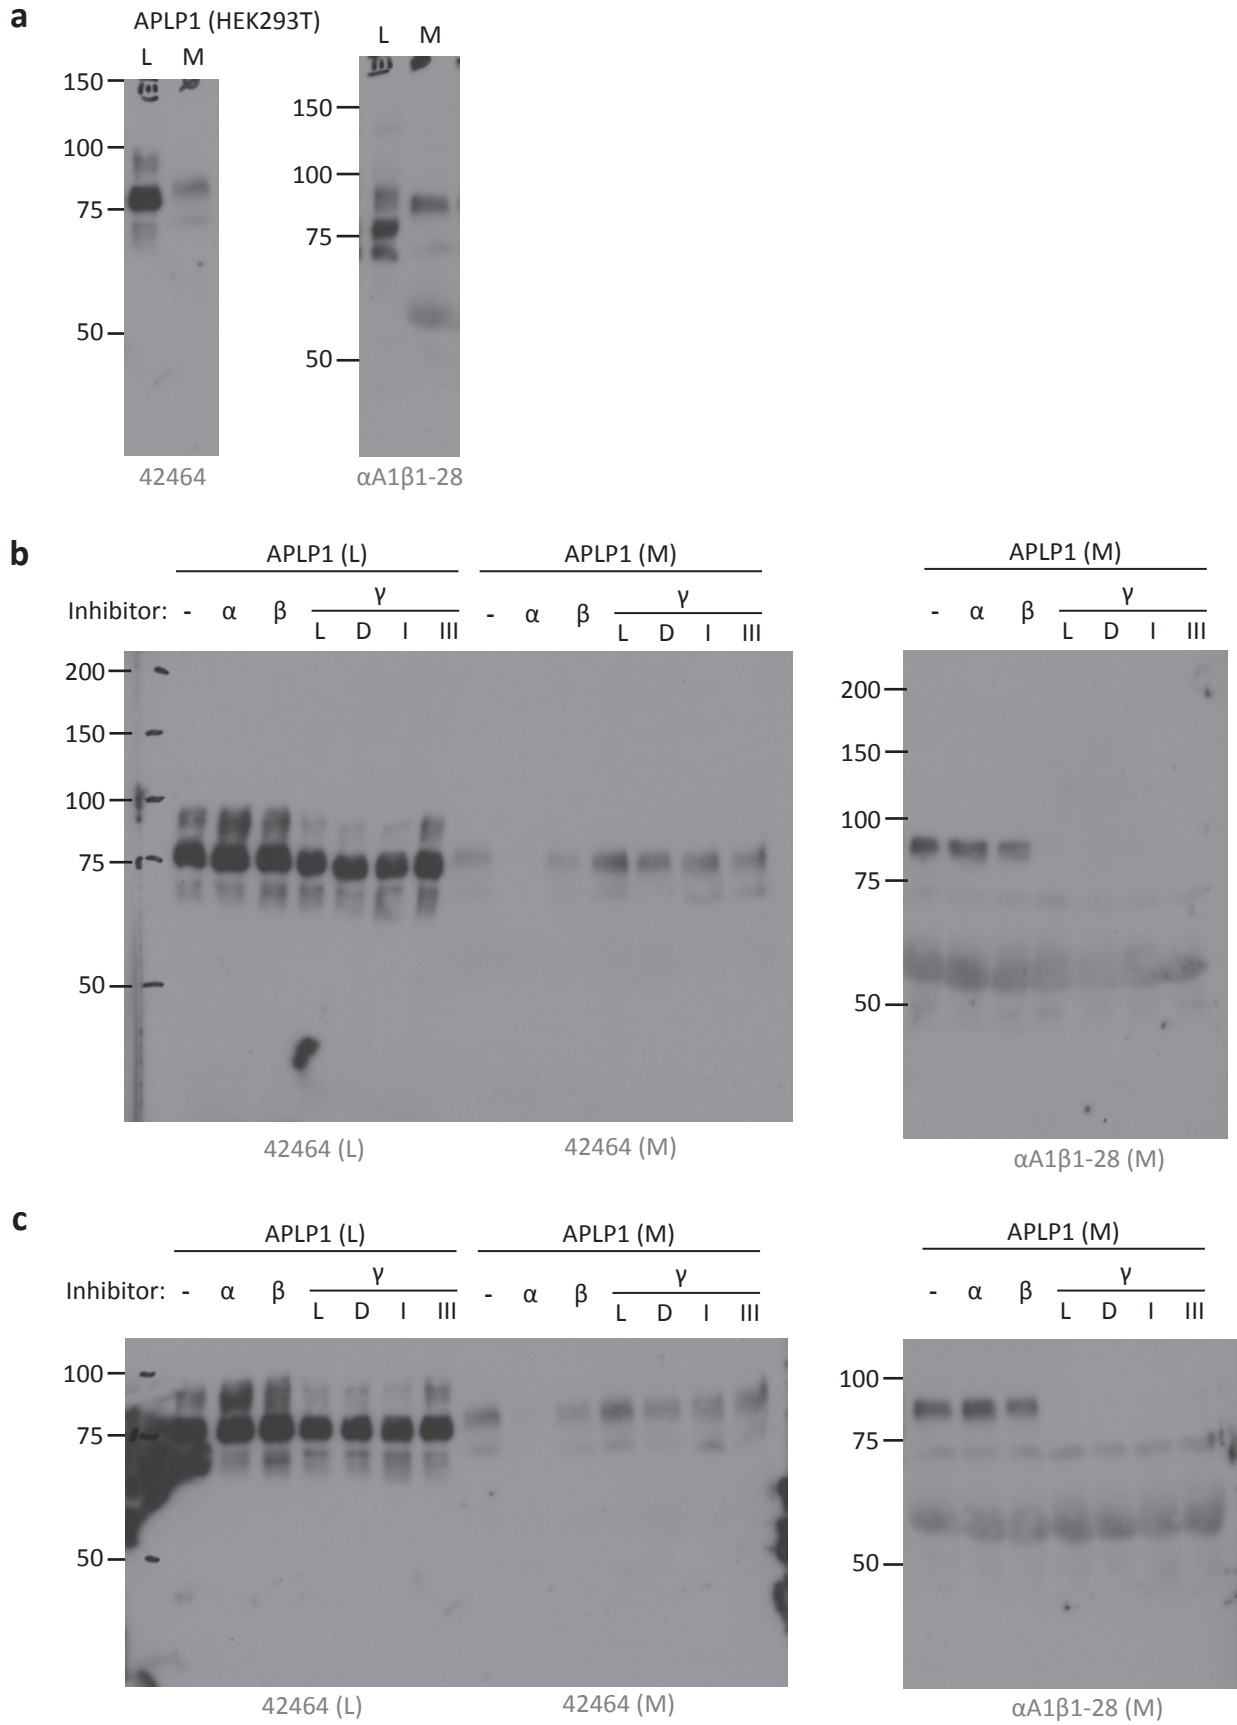

# Suppl. Fig. 3

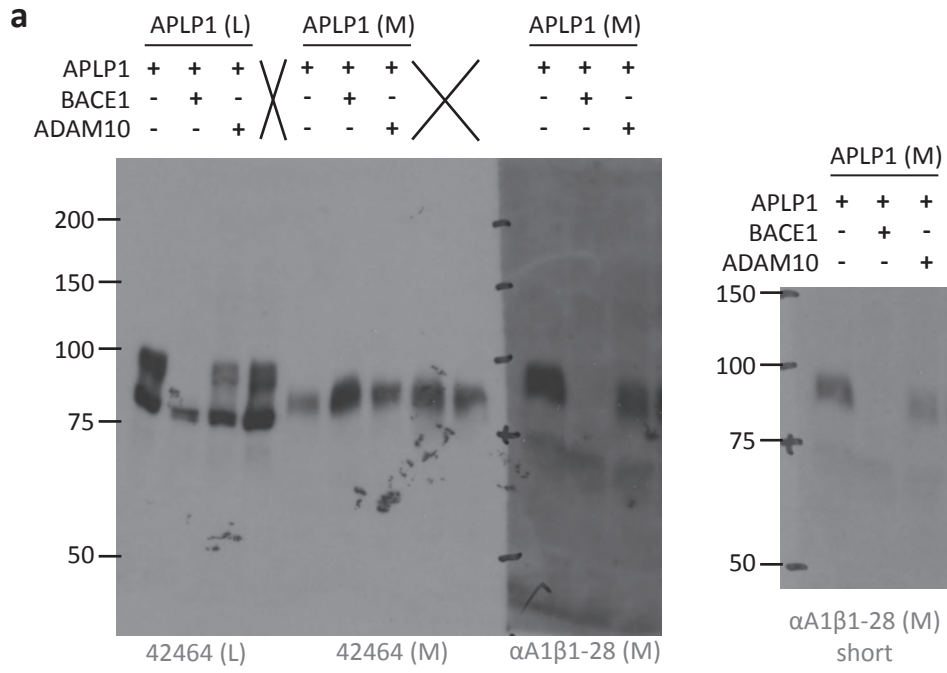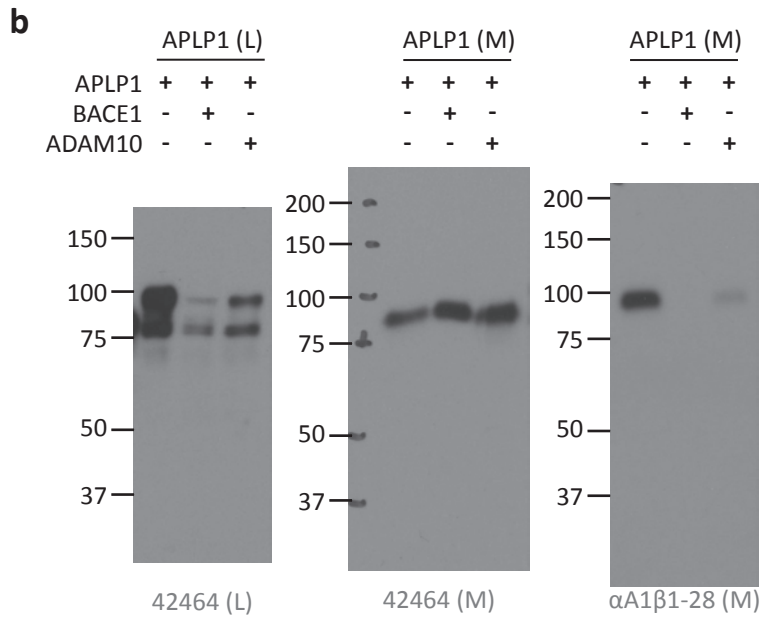

**Suppl. Fig. 4**

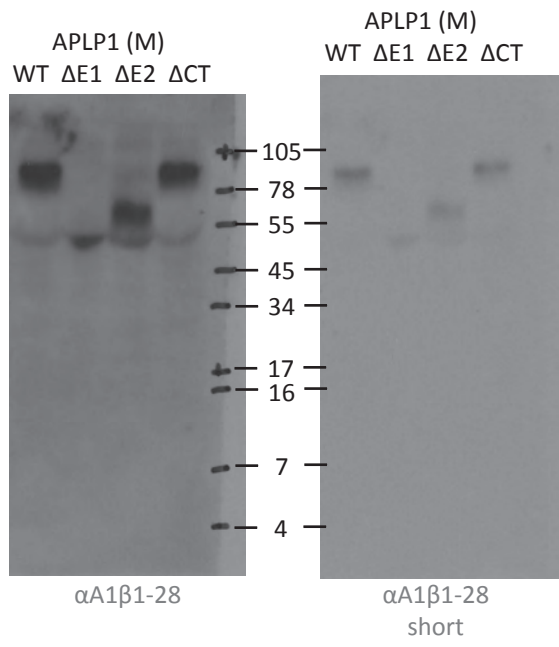

# Suppl. Fig. 5

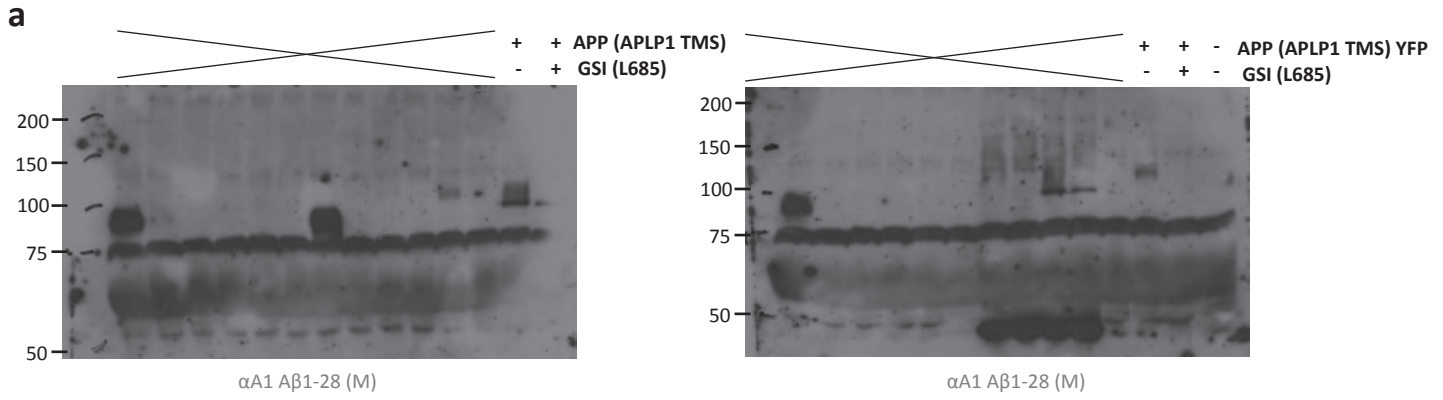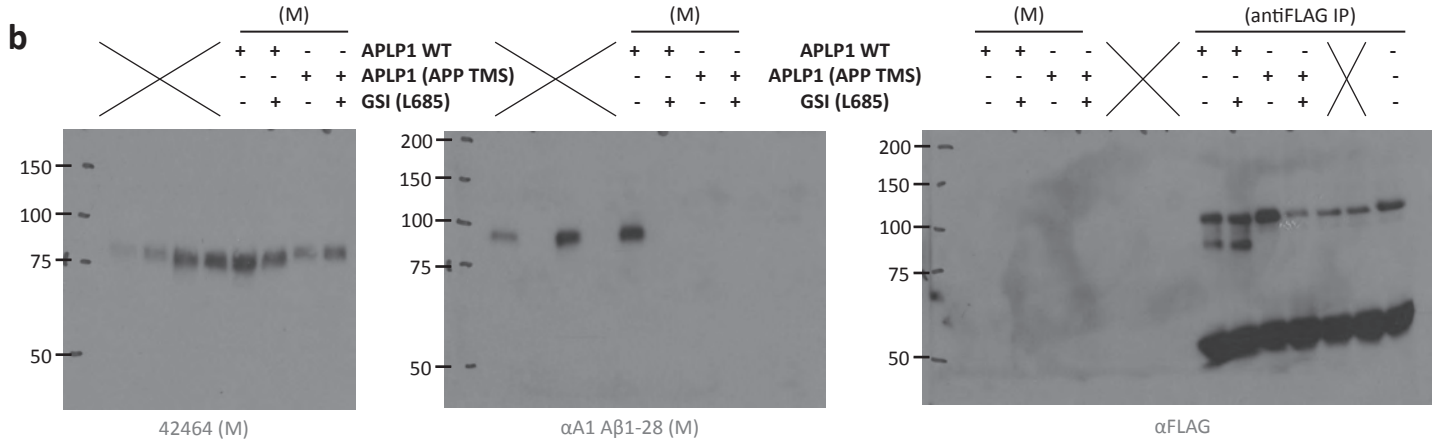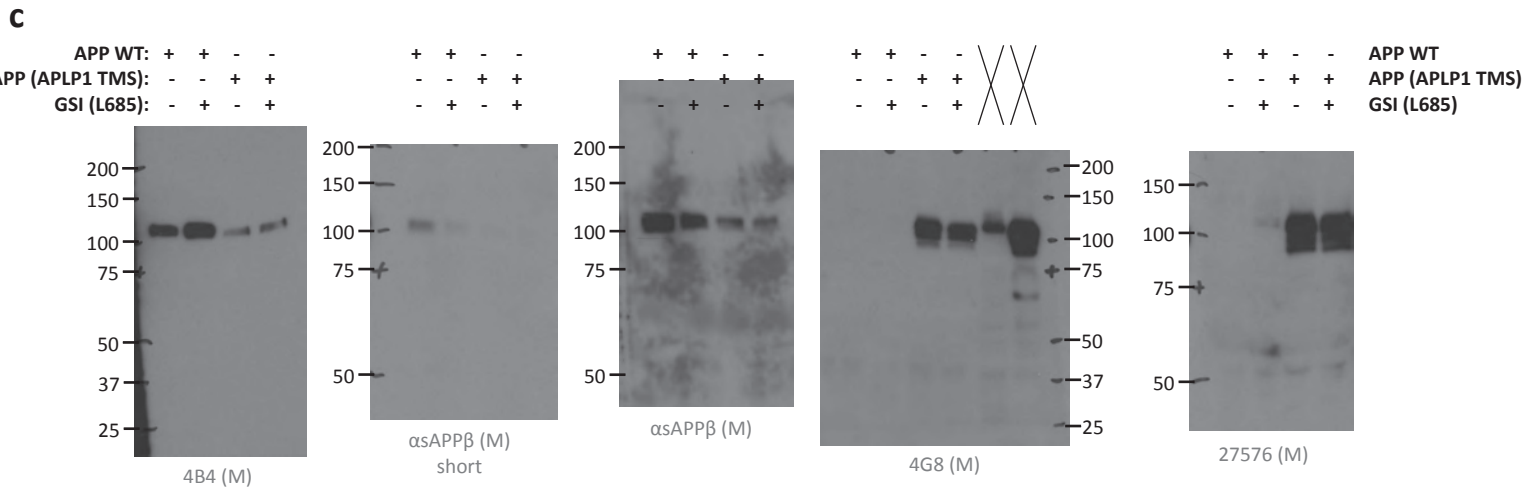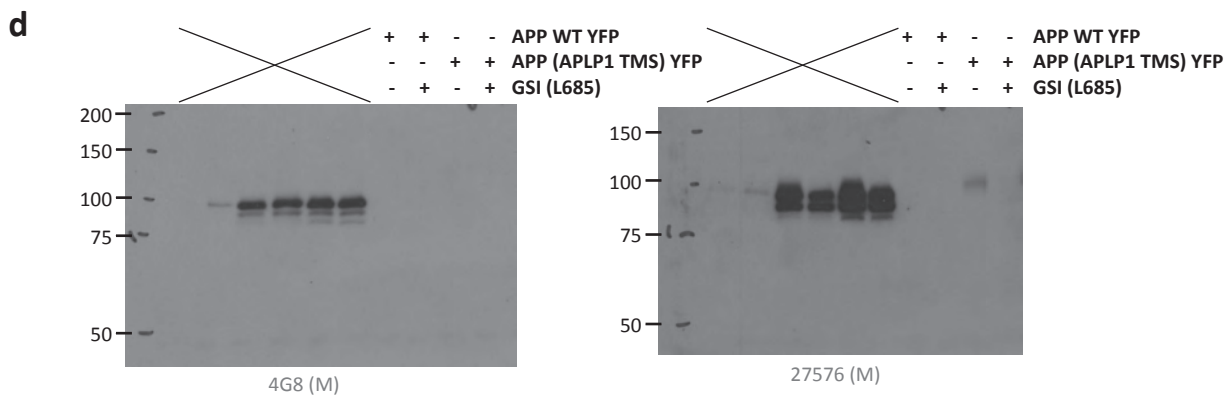

Supplement: 41598_2018_19530_MOESM1_ESM.pdf [file 41598_2018_19530_MOESM1_ESM.pdf]
